# Supplementary material for: Estimating Exceptionally Rare Germline and Somatic Mutation Frequencies via Next Generation Sequencing
Source: PubMed Central journal article supplement (PMC4920415; doi:10.1371/journal.pone.0158340), 2016-06-24

## REVERSE PRIMER FIRST

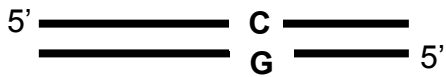

**CYCLE #1**

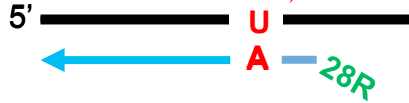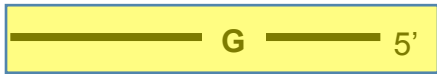

↓ EXO

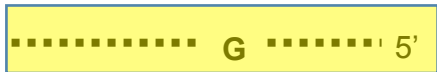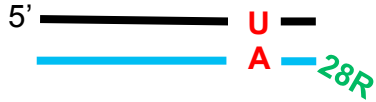

**CYCLE #2**

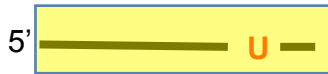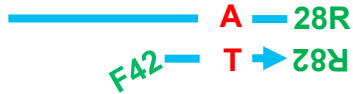

↓ EXO

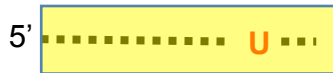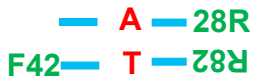

**2nd ROUND PCR  
 PRIMERS F AND R**

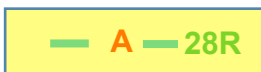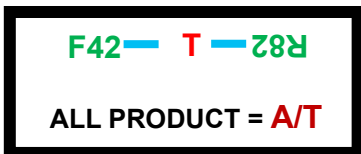

## FORWARD PRIMER FIRST

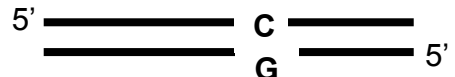

**CYCLE #1**

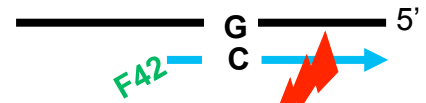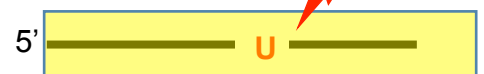

↓ EXO

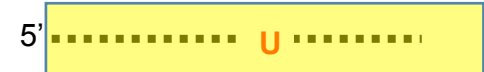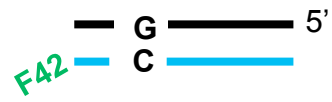

**CYCLE #2**

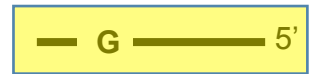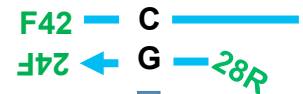

↓ EXO

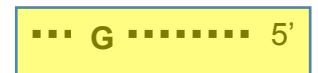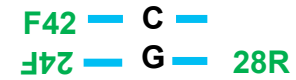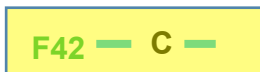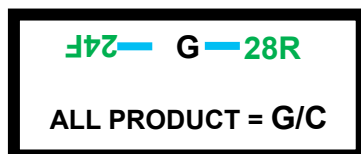

Supplement: pone.0158340.s005.pdf [file pone.0158340.s005.pdf]
