# Supplementary material for: Estimating Exceptionally Rare Germline and Somatic Mutation Frequencies via Next Generation Sequencing
Source: PubMed Central journal article supplement (PMC4920415; doi:10.1371/journal.pone.0158340), 2016-06-24
Supplement: pone.0158340.s006.pdf [file pone.0158340.s006.pdf]

### REVERSE PRIMER FIRST

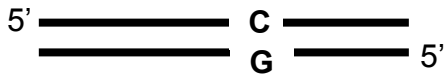

**CYCLE #1** ↓

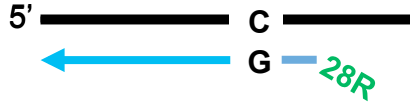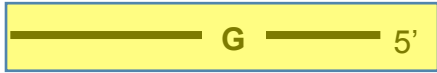

↓ **EXO**

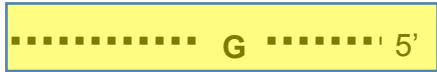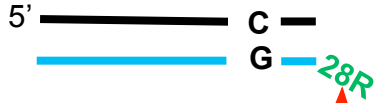

**CYCLE #2** ↓

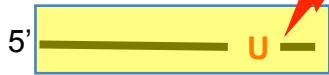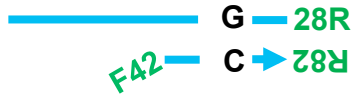

↓ **EXO**

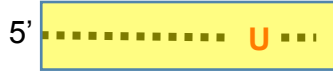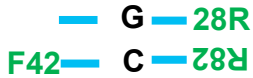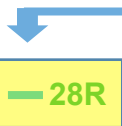

F42 ——— C ——— 28R  
**ALL PRODUCT = G/C**

### FORWARD PRIMER FIRST

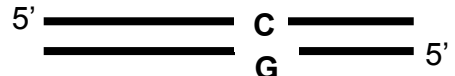

↓ **CYCLE #1**

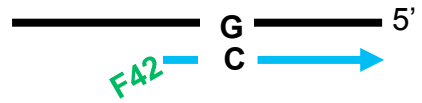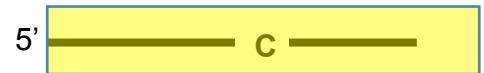

↓ **EXO**

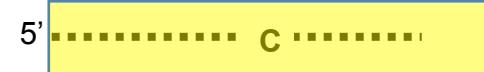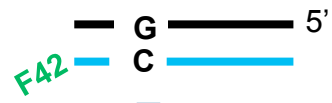

↓ **CYCLE #2**

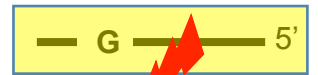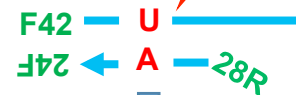

↓ **EXO**

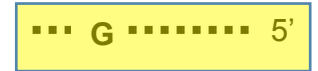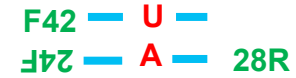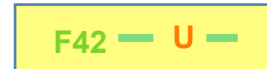

F42 ——— U ———  
 24F ←—— A ——— 28R  
**ALL PRODUCT = A/T**

**2nd ROUND PCR  
 PRIMERS F AND R**
