# Supplementary material for: Estimating Exceptionally Rare Germline and Somatic Mutation Frequencies via Next Generation Sequencing
Source: PubMed Central journal article supplement (PMC4920415; doi:10.1371/journal.pone.0158340), 2016-06-24

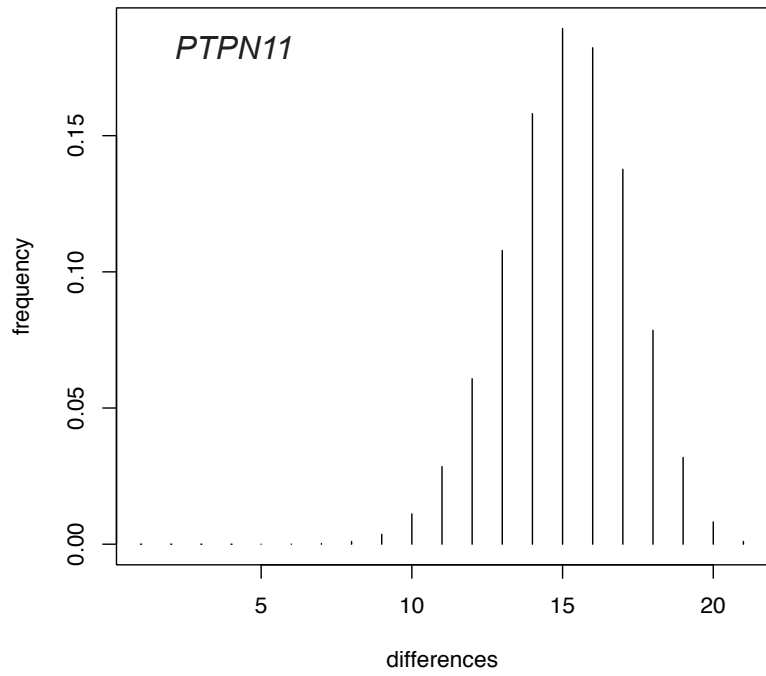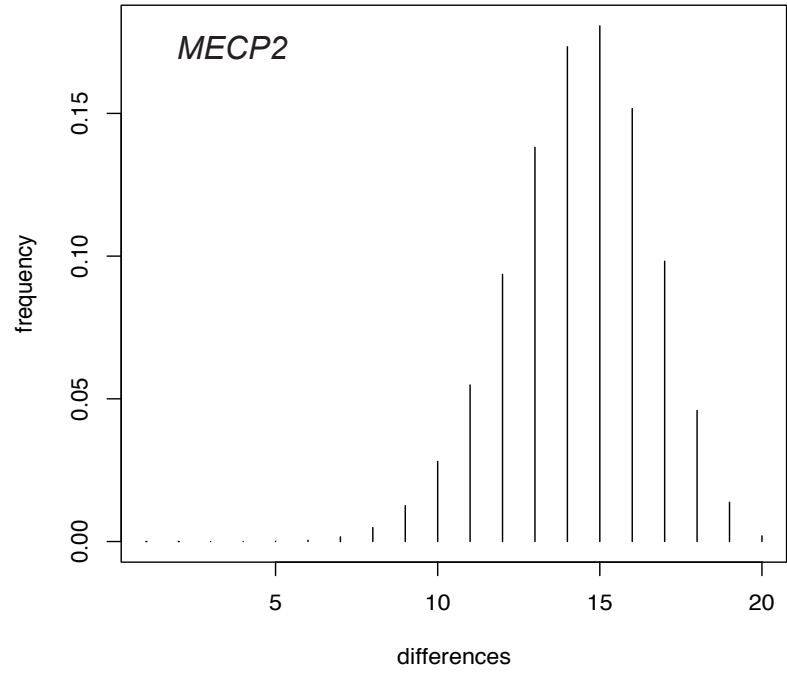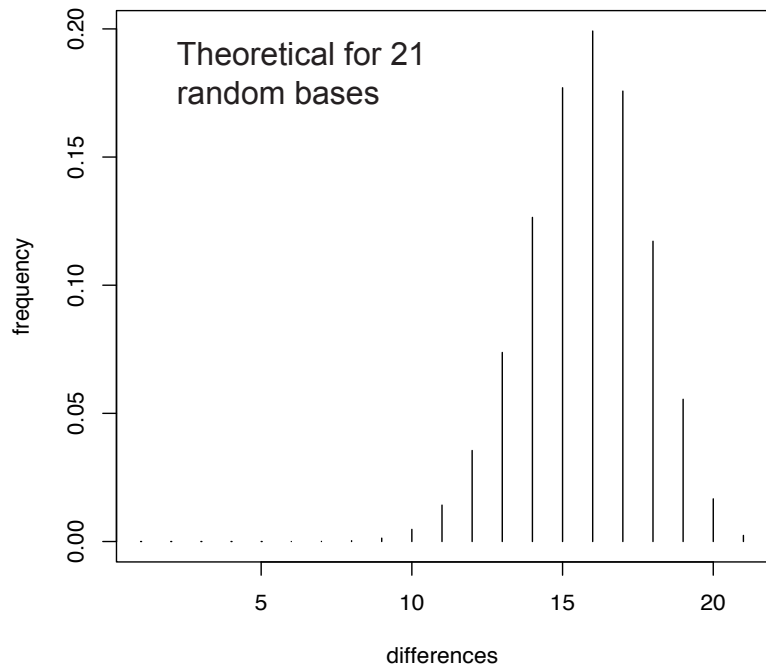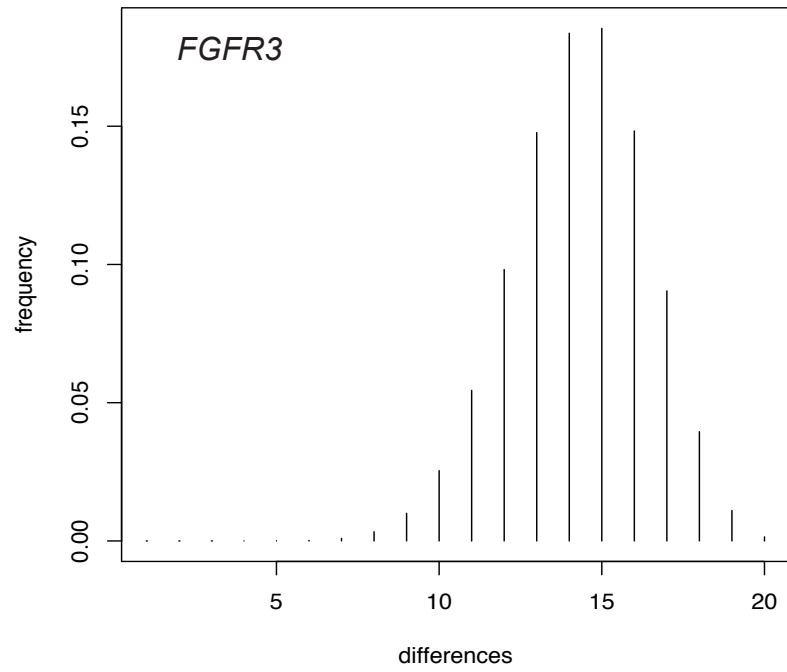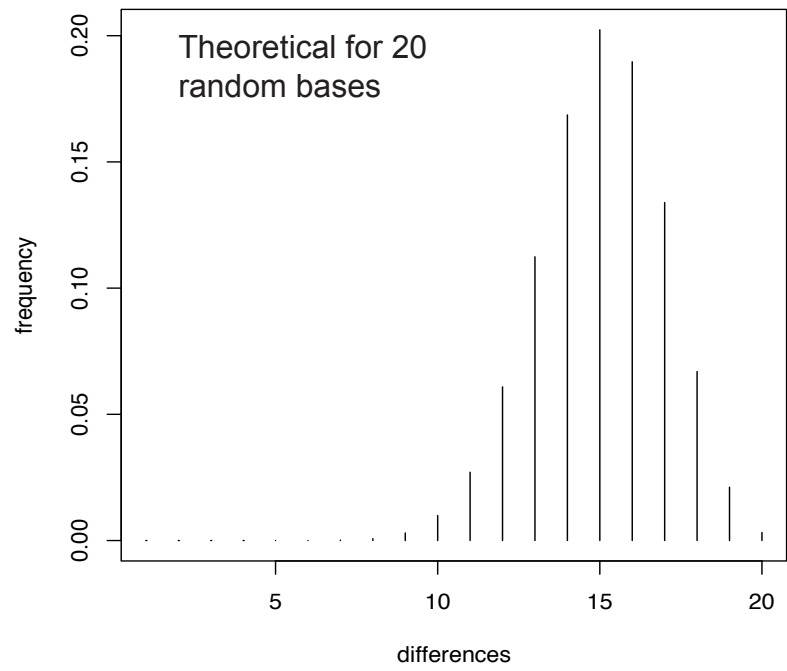

Supplement: pone.0158340.s008.pdf [file pone.0158340.s008.pdf]
