# Supplementary material for: Estimating Exceptionally Rare Germline and Somatic Mutation Frequencies via Next Generation Sequencing
Source: PubMed Central journal article supplement (PMC4920415; doi:10.1371/journal.pone.0158340), 2016-06-24
Supplement: pone.0158340.s009.pdf [file pone.0158340.s009.pdf]

**Table S1. Comparison of somatic (blood) to germline mutation frequencies**

|                 | A or T mutation frequency | C or G mutation frequency |
|-----------------|---------------------------|---------------------------|
| Somatic (blood) | $4.5 \times 10^{-6}$      | $2.8 \times 10^{-5}$      |
| Germline        | $8.7 \times 10^{-6}$      | $8.0 \times 10^{-5}$      |

Data from *PTPN11* experiments
