# Supplementary material for: Estimating Exceptionally Rare Germline and Somatic Mutation Frequencies via Next Generation Sequencing
Source: PubMed Central journal article supplement (PMC4920415; doi:10.1371/journal.pone.0158340), 2016-06-24
Supplement: pone.0158340.s010.pdf [file pone.0158340.s010.pdf]

**Table S2. Mutation frequency as a function of mutation type and loci**

| Mutation type     | Mutation frequency<br><i>PTPN11</i> experiment | Mutation frequency<br><i>MECP2</i> experiment | Mutation frequency<br><i>FGFR3</i> experiment |
|-------------------|------------------------------------------------|-----------------------------------------------|-----------------------------------------------|
| A>C/T>G           | $6.4 \times 10^{-7}$                           | $3.0 \times 10^{-7}$                          | $3.8 \times 10^{-7}$                          |
| C>G/G>C           | $2.6 \times 10^{-6}$                           | $1.1 \times 10^{-6}$                          | $7.5 \times 10^{-7}$                          |
| A>T/T>A           | $2.9 \times 10^{-6}$                           | $1.0 \times 10^{-6}$                          | $4.7 \times 10^{-7}$                          |
| A>G/T>C           | $4.6 \times 10^{-6}$                           | $4.2 \times 10^{-6}$                          | $2.6 \times 10^{-6}$                          |
| C>T/G>A (non-CpG) | $3.6 \times 10^{-5}$                           | $2.7 \times 10^{-5}$                          | $1.0 \times 10^{-5}$                          |
| G>T/C>A           | $3.1 \times 10^{-5}$                           | $4.2 \times 10^{-5}$                          | $1.6 \times 10^{-5}$                          |
| C>T/G>A (CpG)     | $2.2 \times 10^{-4}$                           | $1.9 \times 10^{-4}$                          | $5.0 \times 10^{-5}$                          |
