# Supplementary material for: Estimating Exceptionally Rare Germline and Somatic Mutation Frequencies via Next Generation Sequencing
Source: PubMed Central journal article supplement (PMC4920415; doi:10.1371/journal.pone.0158340), 2016-06-24
Supplement: pone.0158340.s011.pdf [file pone.0158340.s011.pdf]

**Table S3. No significant difference (p-value 0.65) when comparing the mutation frequency in experiments with and without SYBR green**

|                    | Mutation frequency   | 95% confidence interval  |
|--------------------|----------------------|--------------------------|
| Without SYBR green | $2.2 \times 10^{-6}$ | $1.2-3.5 \times 10^{-6}$ |
| With SYBR green    | $2.6 \times 10^{-6}$ | $1.2-4.4 \times 10^{-6}$ |

Data from *MECP2* experiments
